# Supplementary material for: Structure of the MIS12 Complex and Molecular Basis of Its Interaction with CENP-C at Human Kinetochores
Source: PubMed Central journal article supplement (PMC5101189; doi:10.1016/j.cell.2016.10.005), 2016-11-03
Supplement: mmc1.pdf [file mmc1.pdf]

Cell, Volume 167

## **Supplemental Information**

### **Structure of the MIS12 Complex and Molecular Basis of Its Interaction with CENP-C at Human Kinetochores**

**Arsen Petrovic, Jenny Keller, Yahui Liu, Katharina Overlack, Juliane John, Yoana N. Dimitrova, Simon Jenni, Suzan van Gerwen, Patricia Stege, Sabine Wohlgemuth, Pascaline Rombaut, Franz Herzog, Stephen C. Harrison, Ingrid R. Vetter, and Andrea Musacchio**

**Table S1A** *Synonyms of outer kinetochore proteins discussed in this study*

| Protein | Synonym 1                  | Synonym 2 | Synonym 3 | Synonym 4 | Synonym 5 |
|---------|----------------------------|-----------|-----------|-----------|-----------|
| KNL1    | CASC5                      | AF15q14   | Blinkin   | Spc105    | SPC7      |
| ZWINT   | ZW10-interacting protein 1 | Zwint-1   |           |           |           |
| NDC80   | HEC1                       |           |           |           |           |
| NUF2    |                            |           |           |           |           |
| SPC24   |                            |           |           |           |           |
| SPC25   |                            |           |           |           |           |
| PMF1    |                            |           |           |           |           |
| MIS12   |                            |           |           |           |           |
| NSL1    | C1orf48                    | DC31      | DC8       | MIS14     |           |
| DSN1    | C20orf172                  | MIS13     |           |           |           |

**Table S1B** *MIS12C constructs used in this study*

| Construct                  | MIS12 boundaries       | PMF1 boundaries        | NSL1 boundaries                               | DSN1 boundaries                |
|----------------------------|------------------------|------------------------|-----------------------------------------------|--------------------------------|
| Mis12C <sup>Nano</sup>     | Mis12 <sup>1-205</sup> | Pmf1 <sup>31-205</sup> | Nsl1 <sup>1-206</sup>                         | Dsn1 <sup>68-356</sup>         |
| Mis12C <sup>Head1</sup>    | Mis12 <sup>Δ2-90</sup> | Pmf1 <sup>Δ2-127</sup> |                                               |                                |
| Mis12C <sup>Head2</sup>    |                        |                        | Nsl1 <sup>29-99</sup><br>Nsl1 <sup>2-99</sup> | Dsn1 <sup>68-200</sup>         |
| Mis12C <sup>ΔHead1</sup>   | Mis12 <sup>Δ2-90</sup> | Pmf1 <sup>Δ2-114</sup> | Nsl1 <sup>1-206</sup>                         | Dsn1 <sup>68-356</sup>         |
| Mis12C <sup>ΔHead2</sup>   | Mis12 <sup>1-205</sup> | Pmf1 <sup>31-205</sup> | Nsl1 <sup>Δ2-91</sup>                         | Dsn1 <sup>Δ2-185</sup>         |
| Mis12C <sup>Loopless</sup> | Mis12 <sup>1-205</sup> | Pmf1 <sup>31-205</sup> | Nsl1 <sup>1-206</sup>                         | Dsn1 <sup>68-356Δ100-109</sup> |
